# Supplementary material
Source: PubMed Central journal article supplement (PMC9986841)
Supplement: jama-e232307-s002.pdf [file jama-e232307-s002.pdf]

Aggarwal R, Yeh RW, Joynt Maddox KE, Wadhera RK. Cardiovascular risk factor prevalence, treatment, and control in US adults aged 20 to 44 years, 2009 to March 2020. *JAMA*. Published online March 5, 2023. doi:10.1001/jama.2023.2307

### **Data Sharing Statement**

#### **Data**

**Data available:** No

#### **Additional Information**

**Explanation for why data not available:** NHANES data are publicly available to all researchers.
